# Supplementary material for: Effective endothelial cell and human pluripotent stem cell interactions generate functional insulin-producing beta cells
Source: Springer Nature journal article supplement (doi:10.1007/s00125-016-4078-1), 2016-08-27
Supplement: MOESM1 [file 10626830]

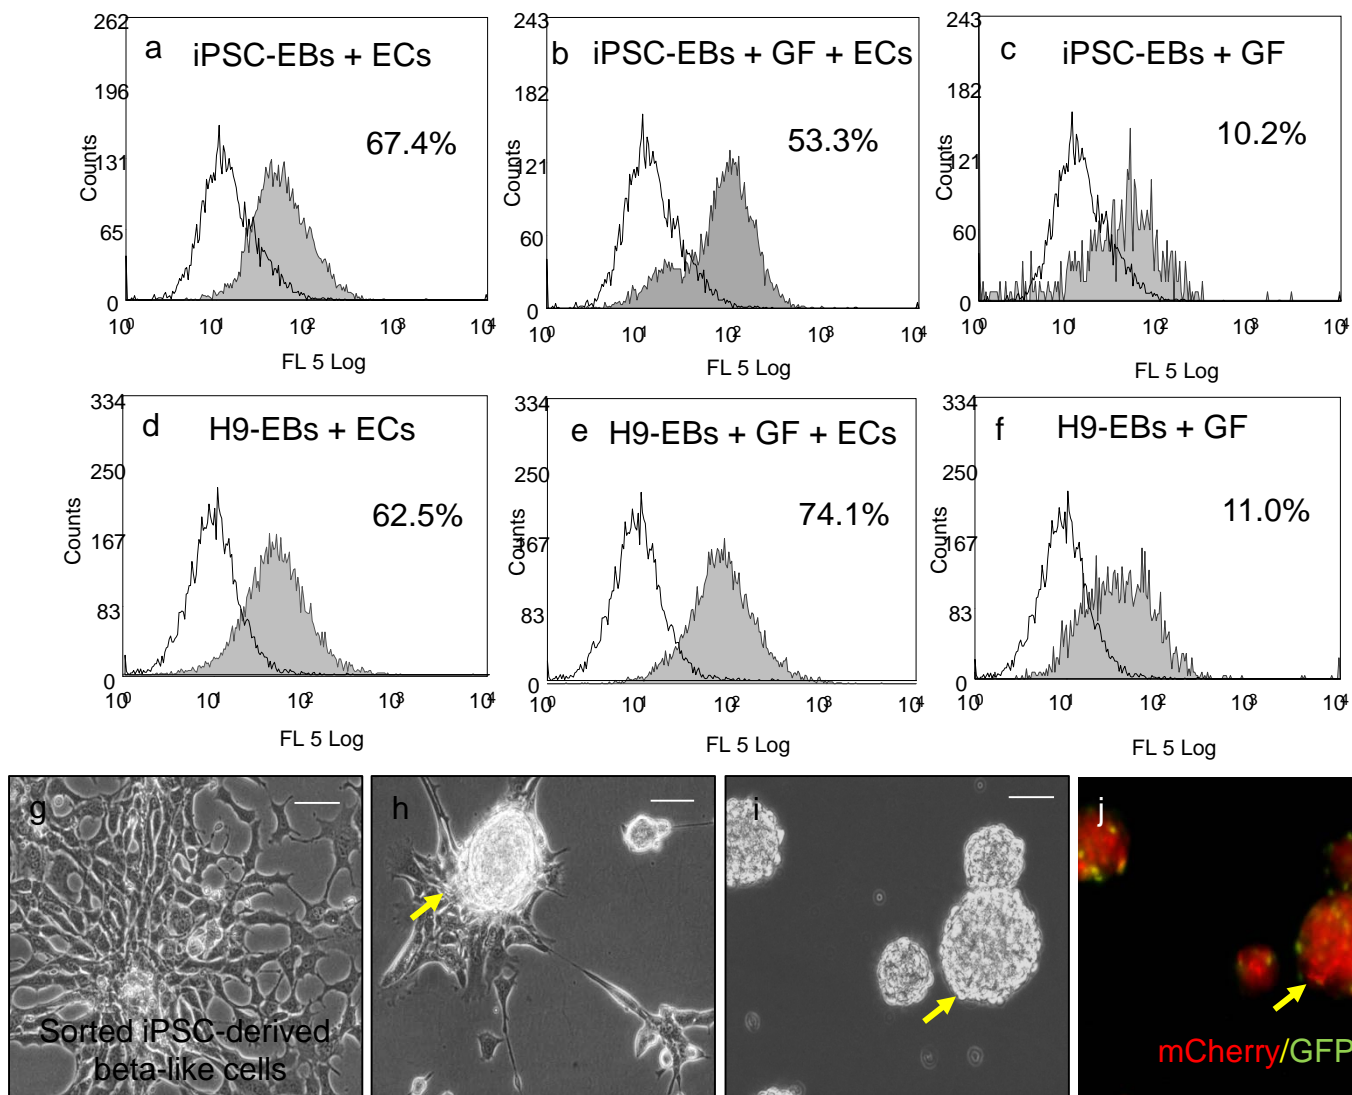

**Fig. 1.** FACS analysis and islet-like formation *in vitro* of hPSC-derived beta-like cells. Proinsulin expression evaluated by FACS of (a) hiPSC-derived EBs co-cultured with ECs. (b) hiPSC-derived EBs co-cultured with ECs and treated with GF. (c) hiPSC-derived EBs only treated with GF. (d) H9-derived EBs co-cultured with ECs. (e) H9 derived EBs co-cultured with ECs and treated with GF. (f) H9-derived EBs only treated with GF. (g) Bright field of sorted beta-like cells derived from co-cultures plated on collagen pre-coated dishes at P3 after sorting. (h) A different field showing cells that form a cluster (yellow arrow). (i) Islet-like structure (yellow arrow). (j) Islet-like cluster that expressed mCherry (driven by insulin promoter) and GFP (driven by ubiquitin C promoter). Bar = 25  $\mu$ m.  $n = 3$ .

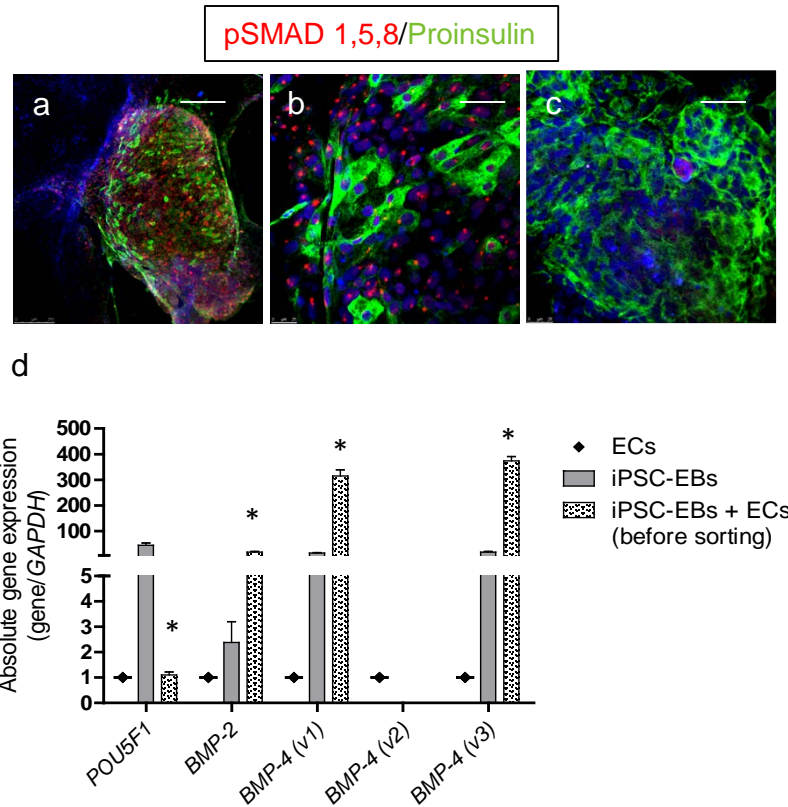

**Fig. 2.** Analysis of proinsulin expression, BMP-2/-4 upregulation and SMAD1,5,8 phosphorylation in EBs cultured alone or co-cultured with ECs. (a) Lower magnification of a cluster composed of cells positive to proinsulin (green) and pSMAD1,5,8 (red) found in EBs co-cultured with ECs. (b) Higher magnification of the same cluster. (c) Higher magnification of a cluster found in EBs cultured alone. (d) Expression of POU5F1, BMP-2, BMP-4 variant 1 (v1), BMP-4 variant 2 (v2), and BMP-4 variant 3 in human microvascular endothelial cells (HMECs), non-sorted cells from EBs cultured alone (iPSC-EBs) or non-sorted cells from EBs co-cultured with ECs. \*  $P < 0.05$ ,  $n=3$ .

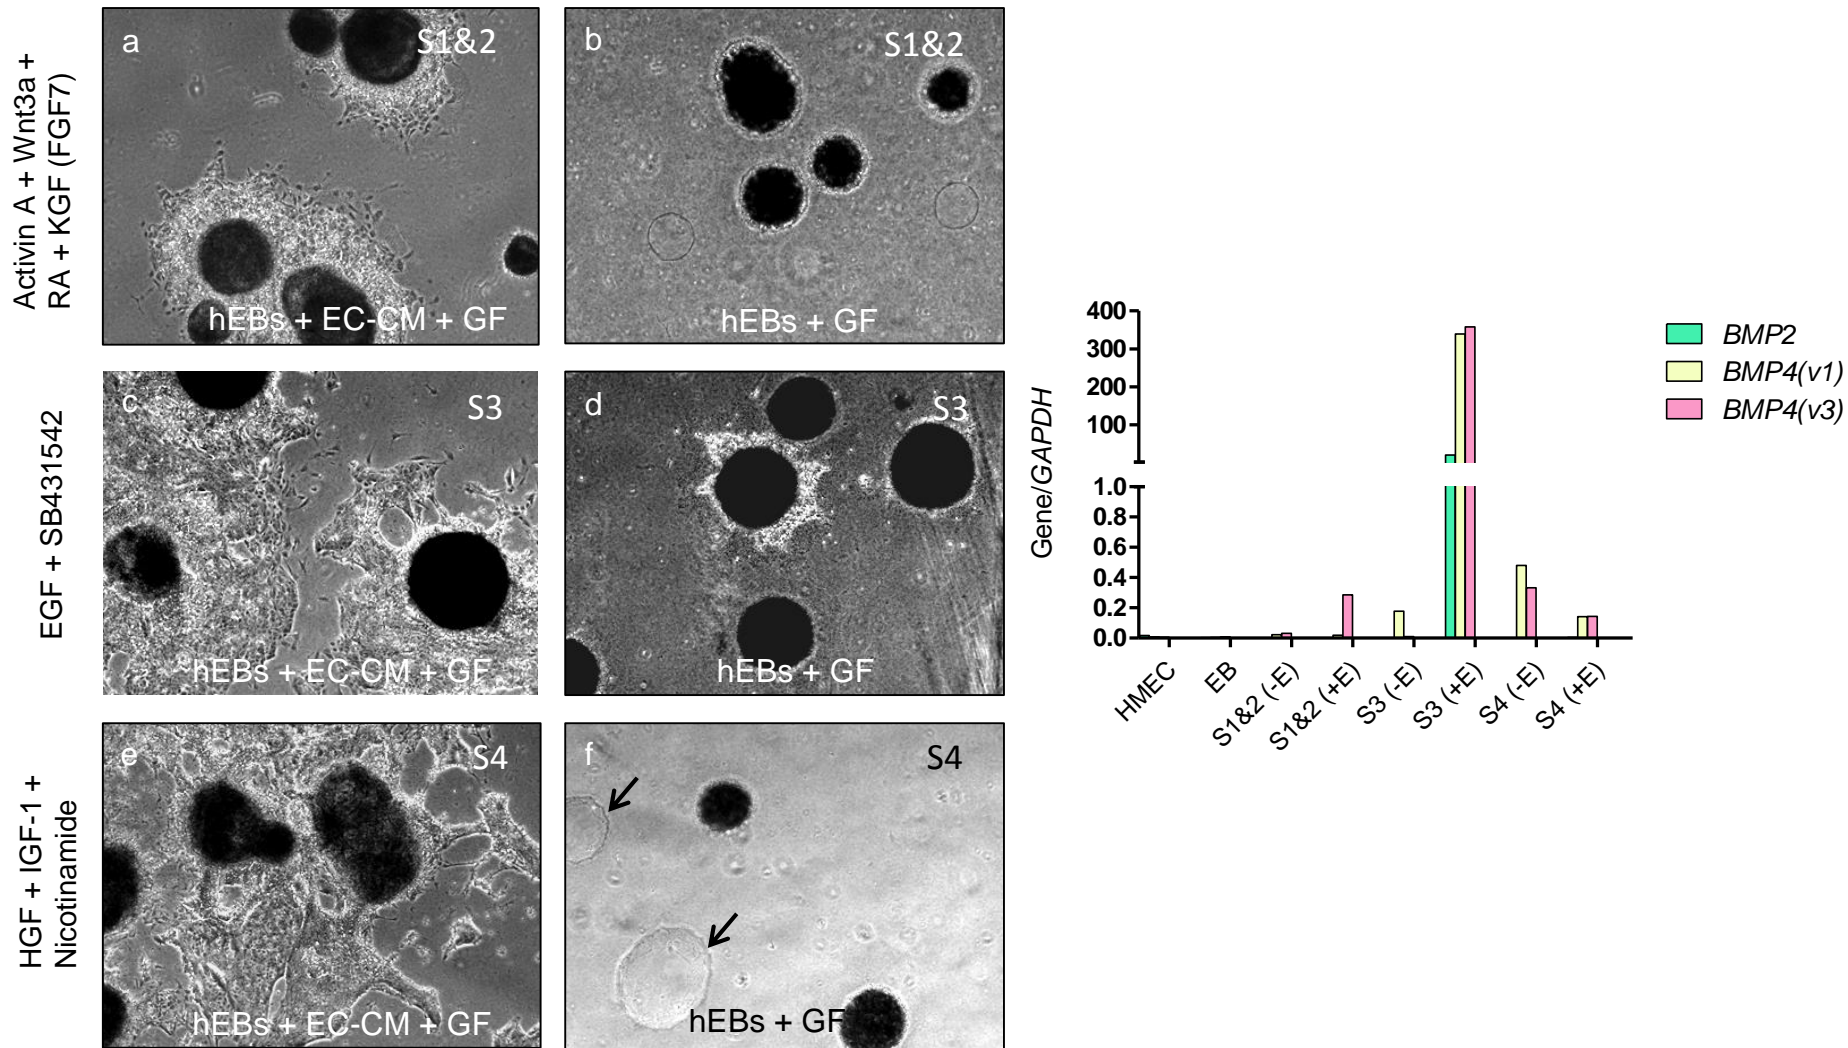

**Fig. 3.** Morphology of human iPSC-derived EBs treated or untreated with EC-conditioned medium (EC-CM) and evaluation of BMP-2/-4 expression. All EBs were treated with pancreatic differentiation factors (GF) and plated in collagen-laminin gels for 20 days. Some EBs were also treated with EC-CM during the four differentiation steps (S1 [activin A, Wnt3a], S2 [retinoic acid and fibroblast growth factor-7], S3 [epidermal growth factor and SB431542], and S4 [hepatocyte growth factor, insulin-like growth factor-1, exendin-4, and nicotinamide]). Human iPSC-derived EBs at S1 and S2 treated (a) or untreated (b) with EC-CM. Human iPSC-derived EBs at S3 treated (c) or untreated (d) with EC-CM. Human iPSC-derived EBs at S4 treated (e) or untreated (f) with EC-CM. (g) Quantification of BMP-2 or two variants of BMP-4 (v1, v3) in EBs at different stages of differentiation in EBs treated with GF in presence (+E) or absence (-E) of ECs. Black arrows indicate empty spaces where EBs detached. Bar = 100  $\mu$ m,  $n=3$ .

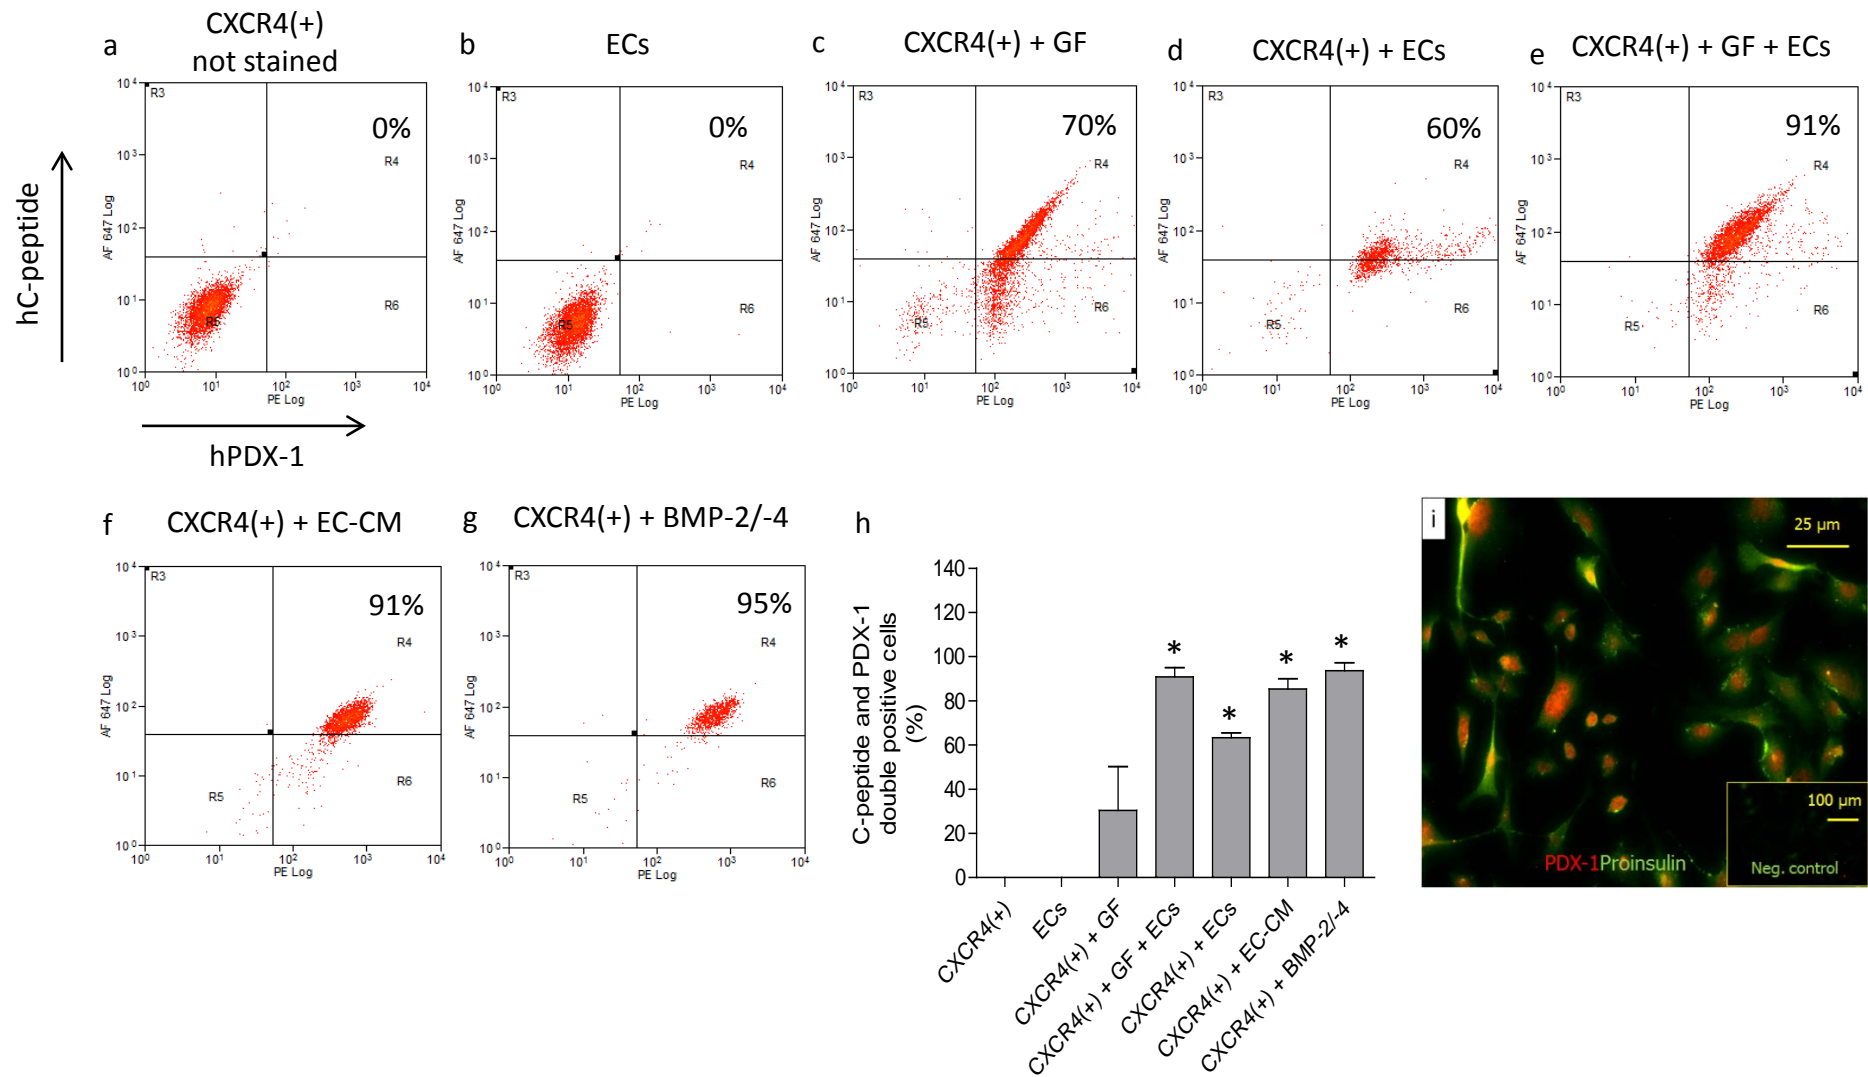

**Fig. 4.** Effects of EC-conditioned medium (EC-CM) or BMP-2/-4 in the differentiation of definitive endoderm (DE) to insulin-producing cells. Co-expression of proinsulin and PDX-1 evaluated by FACS in (a) non-stained definitive endoderm (DE; CXCR4+) derived insulin-producing cells, (b) ECs, (c) DE cells treated with growth factors (GF), (d) DE cells co-cultured with ECs (no treated with GF), (e) DE cells co-cultured with ECs and treated with GF, (f) DE cells treated with GF and EC-CM, (g) DE treated only with a combination of BMP-2 and BMP-4 (100 ng/ml each). (h) Quantification of FACS results. \*  $P < 0.05$ . (i) Co-expression of proinsulin and PDX-1 in beta-like cells after treatment of DE cells with EC-CM (use as an example) evaluated by ICC. Inset shows cells stained with isotype antibodies. Bar = 25  $\mu$ m. Bar Inset = 100  $\mu$ m,  $n=3$ .

Talavera-Adame et al.  
Diab-16-0772

**Table 1.** Primary and secondary antibodies used for immunocytochemistry.

| <b>Antibody</b>                      | <b>Dilution/Concentration</b> | <b>Company</b>                                                                                                                                                                                 |
|--------------------------------------|-------------------------------|------------------------------------------------------------------------------------------------------------------------------------------------------------------------------------------------|
| Proinsulin                           | 1:100                         | Millipore, Billerica, MA, USA                                                                                                                                                                  |
| Phospho-SMAD1,5,8                    | 1:100                         | Cell Signaling, Danvers, MA, USA                                                                                                                                                               |
| PDX-1                                | 1:100                         | Abcam, San Francisco, CA, USA                                                                                                                                                                  |
| CD31                                 | 1:10                          | Abcam, San Francisco, CA, USA                                                                                                                                                                  |
| UCN3                                 | 5 µg/ml                       | Abcam, San Francisco, CA, USA                                                                                                                                                                  |
| Nkx6.1                               | 1:100                         | Developed by Ole D. Madsen and obtained from the Developmental Studies Hybridoma Bank developed under the auspices of NICHD and maintained by the University of Iowa, Iowa City, IA 52242, USA |
| Normal mouse IgG <sub>1</sub>        | 1:100                         | Santa Cruz Biotechnology, Inc., Santa Cruz, CA, USA                                                                                                                                            |
| Normal rabbit IgG                    | 1:50                          | Santa Cruz Biotechnology, Inc., Santa Cruz, CA, USA                                                                                                                                            |
| Alexa Fluor 555 goat anti-rabbit IgG | 1:1000                        | Molecular Probes, Eugene, OR, USA                                                                                                                                                              |
| Alexa Fluor 555 goat anti-mouse IgG  | 1:1000                        | Molecular Probes, Eugene, OR, USA                                                                                                                                                              |

Talavera-Adame et al.  
Diab-16-0772

**Table 2.** Primary and secondary antibodies used for FACS analysis.

| <b>Antibody</b>                                | <b>Dilution/Concentration</b> | <b>Company</b>                                      |
|------------------------------------------------|-------------------------------|-----------------------------------------------------|
| Proinsulin                                     | 1:100                         | Millipore, Billerica, MA, USA                       |
| PDX-1                                          | 1:50                          | Abcam, San Francisco, CA, USA                       |
| Alexa 488 anti-mouse IgG                       | 1:1000                        | Life Technologies, Gran Island, NY, USA             |
| Alexa 555 anti-goat, and Alexa 555 anti-rabbit | 1:1000                        | Life Technologies, Gran Island, NY, USA             |
| Normal rabbit IgG                              | 1:100                         | Santa Cruz Biotechnology, Inc., Santa Cruz, CA, USA |
| Normal mouse IgG <sub>1</sub>                  | 1:100                         | Santa Cruz Biotechnology, Inc., Santa Cruz, CA, USA |

Talavera-Adame et al.  
Diab-16-0772

**Table 3.** Protocol for qPCR

| <b>Step</b> | <b>Step 1</b> | <b>Step 2</b>                            |
|-------------|---------------|------------------------------------------|
| Condition   | 95°C, 10 min  | 94°C, 30 sec; 60°C, 20 sec; 72°C, 30 sec |
| Cycle       | 1             | 45                                       |

**Table 4.** Forward and reverse primers (sequences are 5'-3').

| <b>Gene</b>          | <b>Primer Forward</b>            | <b>Primer Reverse</b>        |
|----------------------|----------------------------------|------------------------------|
| <i>GAPDH</i>         | AGCCACATCGCTCAGACACC             | GTACTCAGCGGCCAGCATCG         |
| <i>INS</i>           | AGCCTTTGTGAACCAACACC             | GCTGGTAGAGGGAGCAGATG         |
| <i>PDX-1</i>         | GGATGAAGTCTACCAAAGCTCACGC        | CCAGATCTTGATGTGTTCTCTCGGTC   |
| <i>SURI</i>          | GTGCACATCCACCACAGCACATGGCTT<br>C | GTGTCTTGAAGAAGATGTATCTCCTCAC |
| <i>GKS</i>           | AAGAAGGTGATGAGACGGATGC           | CATCTGGTGTGTTGGTCTTCACG      |
| <i>PC1/3</i>         | TTGGCTGAAAGAGAACGGGATACATC<br>T  | ACTTCTTTGGTGATTGCTTTGGCGGTG  |
| <i>PC2</i>           | GCATCAAGCACAGACCTACACTCG         | GAGACACAACCACCCTTCATCCTTC    |
| <i>GLUT1</i>         | TCACTGTGCTCCTGGTTCTG             | CTTGTGCTCCTGAGAGATCC         |
| <i>Kir6.2</i>        | CGCTGGTGGACCTCAAGTGGC            | CCTCGGGGCTGGTGGTCTTGCG       |
| <i>Nkx6.1</i>        | CTGGCCTGTACCCCTCATCA             | CTTCCCGTCTTTGTCCAACAA        |
| <i>GCG</i>           | AGGCAGACCCACTCAGTGA              | AACAATGGCGACCTCTTCTG         |
| <i>STT</i>           | GTACTTCTTGGCAGAGCTGCTG           | CAGAAGAAATTCTTGCAGCCAG       |
| <i>OCT4</i>          | CGACCATCTGCCGCTTTG               | GCCGCAGCTTACACACATGTTCT      |
| <i>BMP-2</i>         | AAAACGTCAAGCACCACACAAA           | GTCACTGAAGTCCACGTACAAAGG     |
| <i>BMP-4</i><br>(v1) | CCAAGCGTAGCCCTAAGCAT             | GGCGCCGGCAGTTCTT             |
| <i>BMP-4</i><br>(v2) | GCCAAGCGTAGCCCTAAGC              | CGCCGGCAGTTCTTATTCTT         |
| <i>BMP-4</i><br>(v3) | GCCAAGCGTAGCCCTAAGC              | CGCCGGCAGTTCTTATTCTT         |



Talavera-Adame et al.  
Diab-16-0772

**Table 5.** Primary antibodies used for immunohistochemical analysis.

| <b>Antibody</b> | <b>Dilution/Concentration</b> | <b>Company</b>                |
|-----------------|-------------------------------|-------------------------------|
| Insulin         | 1:500                         | Dako, Carpinteria, CA, USA    |
| Somatostatin    | 1:500                         | Abcam, San Francisco, CA, USA |
| Glucagon        | 1:500                         | Abcam, San Francisco, CA, USA |
